# Supplementary material for: Association between the MMP‐1‐1607 1G/2G Polymorphism and Osteoarthritis Risk: A Systematic Review and Meta‐Analysis
Source: Hindawi journal article supplement (doi:10.1155/2020/5190587), 2020-01-01
Supplement: f1 [file 5190587.f1.pdf]

| Supplementary table 1 Quality assessment of studies included in the meta-analysis using a Newcastle-Ottawa Scale |                                     |             |              |            |               |          |           |           |
|------------------------------------------------------------------------------------------------------------------|-------------------------------------|-------------|--------------|------------|---------------|----------|-----------|-----------|
|                                                                                                                  | Author                              | Barlas 2009 | Planello2011 | Allah 2012 | Lepetsos 2014 | Luo 2015 | Yang 2015 | Geng 2018 |
| Selection                                                                                                        | Is the case definition adequate     | 1           | 1            | 1          | 1             | 1        | 1         | 1         |
|                                                                                                                  | Representativeness of the cases     | 0           | 1            | 0          | 1             | 0        | 0         | 0         |
|                                                                                                                  | Selection of Controls               | 0           | 1            | 0          | 0             | 1        | 1         | 1         |
|                                                                                                                  | Definition of Controls              | 1           | 1            | 1          | 1             | 1        | 1         | 1         |
| Comparability                                                                                                    | Comparability of cases and controls | 2           | 1            | 2          | 2             | 2        | 2         | 2         |
| Exposure                                                                                                         | Ascertainment of exposure           | 1           | 1            | 1          | 2             | 1        | 2         | 2         |
|                                                                                                                  | Same method of ascertainment        | 1           | 1            | 1          | 1             | 1        | 1         | 1         |
|                                                                                                                  | Non-Response rate                   | 0           | 0            | 0          | 0             | 0        | 0         | 0         |
|                                                                                                                  | Total                               | 6           | 7            | 6          | 8             | 7        | 8         | 8         |

Supplementary table2 P-value of each subject for meta regression analysis in five genetic models

| Subject                      | Allelic  | Dominant          | Recessive         | Homozygote   | Heterozygote |
|------------------------------|----------|-------------------|-------------------|--------------|--------------|
|                              | 2G vs 1G | 2G1G+2G2G vs 1G1G | 2G2G vs 1G1G+1G2G | 2G2G vs 1G1G | 2G1G vs 1G1G |
| Ethnicity (Caucasian, Asian) | 0.732    | 0.807             | 0.675             | 0.741        | 0.816        |
| OA site (keen OA, TMJ OA)    | 0.811    | 0.7               | 0.858             | 0.749        | 0.687        |
| Method (PCR-RLFP, HRMA)      | 0.692    | 0.738             | 0.661             | 0.705        | 0.745        |
| Design (HCC, PCC)            | 0.874    | 0.71              | 0.955             | 0.801        | 0.691        |
| Sample (Blood, Buccal cell)  | 0.811    | 0.7               | 0.858             | 0.749        | 0.687        |
| Surgery (Yes, No)            | 0.786    | 0.912             | 0.74              | 0.866        | 0.939        |
| Total Size (<300, ≥300)      | 0.732    | 0.807             | 0.675             | 0.741        | 0.816        |
| Mean age (<60, ≥60)          | 0.26     | 0.31              | 0.26              | 0.321        | 0.312        |
| NOS (<7, ≥7)                 | 0.831    | 0.948             | 0.694             | 0.898        | 0.912        |

OA: osteoarthritis; TMJ: temporomandibular joint; PCR-RFLP: polymerase chain reaction-restriction fragment length polymorphism; HRMA: high resolution melting assay. HCC: Hospital based case-control study, PCC: Population based case-control study; NOS: Newcastle-Ottawa Scale
